# Supplementary material
Source: Research Square preprint supplement (doi:10.21203/rs.3.rs-8477170/v1)
Supplement: Supplementary file 2 [file 4c6231404d0635bb15c0aec0.pdf]

# Impact of Regional Driving Behavior Differences on Traffic

## Flow

Yuting Wang<sup>1,2</sup>, Zhaocheng He<sup>1,2,3,\*</sup>, Lijian Zhuang<sup>4</sup>

<sup>1</sup> School of Intelligent Engineering, Sun Yat-sen University

<sup>2</sup> Guangdong Provincial Key Laboratory of Intelligent Transportation System Sun Yat-Sen University

<sup>3</sup> The Pengcheng Laboratory

<sup>4</sup> Shenzhen Urban Transport Planning Center Co., Ltd.

\* Corresponding author. E-mail: hezhch@mail.sysu.edu.cn

## Supplementary Information

|                                                                                                 |   |
|-------------------------------------------------------------------------------------------------|---|
| . Supplementary Tables .....                                                                    | 2 |
| Supplementary Table 1. Mean values of performance metrics for each functional station type..... | 2 |
| Supplementary Table 2. Description of charging station construction and operational data.....   | 2 |
| Supplementary Table 3. Description of charging transaction data.....                            | 2 |
| Supplementary Table 4. Description of network resilience metrics.....                           | 3 |
| Supplementary Algorithm .....                                                                   | 4 |
| Supplementary Algorithm 1 .....                                                                 | 4 |
| Supplementary Algorithm 2 .....                                                                 | 7 |
| Supplementary Algorithm 3 .....                                                                 | 8 |

## . Supplementary Tables

Supplementary Table 1. Mean values of performance metrics for each functional station type.

| Cluster ID | Functional Type | No. of Stations | $F_1$ | $F_2$ | $T_1$ | $T_2$ | $M_1$ | $M_2$ | $E_1$  | $E_2$ | Connectors | Power (kW) |
|------------|-----------------|-----------------|-------|-------|-------|-------|-------|-------|--------|-------|------------|------------|
| 0          | 5413            | 71.49%          | 0.2   | 0.13  | 0.84  | 0.48  | 4.45  | 2.66  | 3.58   | 2.09  | 26.72      | 46.01      |
| 1          | 1236            | 16.32%          | 0.6   | 0.54  | 3.5   | 3.11  | 12.87 | 11.06 | 10.74  | 9.25  | 20.17      | 46.79      |
| 2          | 91              | 1.20%           | 3.16  | 1.08  | 2.26  | 0.93  | 63.94 | 9.36  | 120.74 | 51.98 | 19.34      | 132.43     |
| 3          | 832             | 10.99%          | 0.53  | 0.28  | 1.5   | 0.7   | 7.31  | 3.39  | 7.83   | 3.69  | 80.89      | 17.15      |

Supplementary Table 2. Description of charging station construction and operational data.

| Field           | Data Type | Description                                                                                   |
|-----------------|-----------|-----------------------------------------------------------------------------------------------|
| station_id      | Integer   | A unique identifier for each physical charging station.                                       |
| station_type    | Enum      | The category of the station (e.g., public, private, battery-swapping).                        |
| num_connectors  | Integer   | The total number of charging connectors (outlets) at the station.                             |
| num_piles       | Integer   | The total number of charging piles (physical units) at the station.                           |
| address         | String    | The detailed street address of the station.                                                   |
| site_context    | String    | The physical environment of the station (e.g., underground parking, roadside, shopping mall). |
| electricity_fee | Decimal   | The price per kilowatt-hour (kWh) of electricity.                                             |
| service_fee     | Decimal   | The service fee, charged either per session or per kWh.                                       |
| longitude       | Decimal   | The longitude of the station's location (WGS84).                                              |
| latitude        | Decimal   | The latitude of the station's location (WGS84).                                               |
| total_power     | Decimal   | The total rated power of all charging equipment at the station, in kilowatts (kW).            |

Supplementary Table 3. Description of charging transaction data.

| Field            | Data Type     | Description                                                                      |
|------------------|---------------|----------------------------------------------------------------------------------|
| station_id       | Integer       | A unique identifier for the charging station.                                    |
| equipment_id     | Integer       | A unique identifier for a specific piece of charging equipment within a station. |
| connector_id     | Integer       | A unique identifier for a specific charging connector on a piece of equipment.   |
| order_id         | String        | A unique identifier for each charging session.                                   |
| start_time       | Datetime      | The start time of the charging session (to the second).                          |
| end_time         | Datetime      | The end time of the charging session (to the second).                            |
| energy_delivered | Decimal (kWh) | The total energy delivered during the session, in kilowatt-hours (kWh).          |

|                 |         |                                                                                |
|-----------------|---------|--------------------------------------------------------------------------------|
| total_fee       | Decimal | The total fee for the session, including both electricity and service charges. |
| electricity_fee | Decimal | The portion of the total fee corresponding to the electricity consumed.        |
| service_fee     | Decimal | The portion of the total fee corresponding to the service charge.              |

Supplementary Table 4. Description of network resilience metrics.

| Category                              | Metric                                                                                                               | Definition                                                                                                                                                                                     | Interpretation & Role in Analysis                                                                                                                                                 |
|---------------------------------------|----------------------------------------------------------------------------------------------------------------------|------------------------------------------------------------------------------------------------------------------------------------------------------------------------------------------------|-----------------------------------------------------------------------------------------------------------------------------------------------------------------------------------|
| <b>Structural Integrity</b>           | Network size                                                                                                         | The total number of nodes in the network.                                                                                                                                                      | Indicates the extent of node removal or failure.                                                                                                                                  |
|                                       | Number of connected components                                                                                       | The number of maximal subgraphs in which any two nodes are connected to each other by paths.                                                                                                   | An increase signifies network fragmentation and reduced interconnectivity.                                                                                                        |
|                                       | Size of the largest connected component (LCC)                                                                        | The number of nodes in the network's largest connected component.                                                                                                                              | A high value indicates the presence of a giant component maintaining overall function; a sharp decrease signals the collapse of the network backbone.                             |
| <b>Core Robustness</b>                | Maximum $k$ -core number                                                                                             | The largest integer $k$ for which a $k$ -core (a maximal subgraph where every node has a degree of at least $k$ ) exists.                                                                      | A high value indicates a densely interconnected core. A rapid drop to zero during an attack signifies the failure of this core skeleton.                                          |
| <b>Accessibility &amp; Efficiency</b> | Average path length                                                                                                  | The average of the shortest path lengths over all pairs of reachable nodes.                                                                                                                    | Reflects the average travel distance between nodes in a connected network. A sudden drop after fragmentation indicates that measurements are confined to small, local components. |
|                                       | The average of the inverse of the shortest path lengths over all pairs of nodes (unreachable pairs contribute zero). | Measures the efficiency of information or resource flow across the entire network. A high value indicates high accessibility and efficiency. May exhibit complex behaviour post-fragmentation. | The average of the inverse of the shortest path lengths over all pairs of nodes (unreachable pairs contribute zero).                                                              |

# Supplementary Algorithm

## Supplementary Algorithm 1

---

**Algorithm 1** 基于主成分降维的充电站聚类评级算法

---

**Input:** 特征矩阵  $X \in R^{n \times d}$ ; KMO 阈值  $\tau$ ; 显著性水平  $\alpha$ ; 累计解释率阈值  $\eta$ ; 候选簇数集合  $\mathcal{K}$ ;

候选算法  $\mathcal{A} = \{\text{K-means, Agglo, DBSCAN}\}$

**Output:** 每个站点的簇标签  $c_i$  及对应的聚类评价指标

- 1: ▷ 特征标准化, 参见式 (A1)
  - 2: 依据式 (3-5) 对  $X$  做 Z-score 标准化, 得到矩阵  $Z$ , 并构造相关矩阵  $R$
  - 3: ▷ KMO 与 Bartlett 适用性检验, 参见式 (A2)-(A3)
  - 4: 计算 KMO 统计量与 Bartlett 检验统计量  $\chi^2$  及其  $p$  值
  - 5: **if**  $\text{KMO} \leq \tau$  **or**  $p \geq \alpha$  **then**
  - 6:     **return** “数据不适合进行主成分降维处理”
  - 7: **end if**
  - 8: ▷ 主成分提取与主成分得分计算, 参见式 (A4)-(A6)
  - 9: 对  $R$  做特征分解  $Rw_q = \lambda_q w_q$ , 按  $\lambda_q$  由大到小排序
  - 10: 根据式 (A5) 计算累计解释率  $\eta(Q)$ , 选择满足  $\eta(Q) \geq \eta$  且碎石图出现拐点的主成分个数  $Q$
  - 11: 构造投影矩阵  $W = [w_1, \dots, w_Q]$  并计算主成分得分矩阵  $Y = ZW$
  - 12: ▷ 聚类参数确定与建模, 参见式 (A7)
  - 13: **for all**  $A \in \mathcal{A}$  **do**
  - 14:     **if**  $A$  为 K-means 或 Agglomerative **then**
  - 15:         在  $k \in \mathcal{K}$  上利用式 (3-11) 计算  $\text{WCSS}(k)$  并采用手肘法确定  $k^*$
  - 16:         在  $Y$  上用  $A$  和簇数  $k^*$  进行聚类, 得到标签向量  $c^{(A)}$
  - 17:     **else** ▷  $A$  为 DBSCAN
  - 18:         依据  $k$ -distance 曲线选取  $(\epsilon, \text{MinPts})$  并在  $Y$  上运行 DBSCAN, 得到  $c^{(A)}$
  - 19:     **end if**
  - 20: ▷ 聚类质量评价, 参见轮廓系数式 (A8)
  - 21:     计算当前聚类结果的平均轮廓系数  $S^{(A)}$
  - 22: **end for**
  - 23: 选择具有最大  $S^{(A)}$  的算法  $A^*$  及其参数, 令最终簇标签  $c_i \leftarrow c_i^{(A^*)}$
  - 24: **return**  $\{c_i\}_{i=1}^n$  及相应的聚类质量评价结果
- 

基于主成分降维的充电站聚类评级算法详细步骤与公式:

(1) 符号定义与数据标准化

设共有  $n$  个充电站、 $d$  个评价特征, 构建特征矩阵  $X = [x_{ij}]_{(n \times d)}$ , 其中  $x_i$  为站点  $i$  的特

征向量。考虑不同指标量纲差异, 采用 Z-score 标准化得到:

$$z_{ij} = (x_{ij} - \mu_j) / \sigma_j \quad \text{A1}$$

其中  $\mu_j$ 、 $\sigma_j$  分别为第  $j$  个特征的均值与标准差。标准化后的矩阵记为  $Z$ , 用于相关结构检验与降维计算。

(2) KMO 与 Bartlett 球形检验

由于特征指标之间可能存在相关性, 降维前需检验数据结构是否适合提取潜在变量。

1) KMO 检验用于衡量变量间相关性是否适合做主成分/因子提取。令  $r_{jk}$  为相关系数,  $\rho_{jk}$  为偏相关系数, 则

$$KMO = \left[ \sum_{(j \neq k)} r_{jk}^2 \right] / \left[ \sum_{(j \neq k)} r_{jk} + \sum_{(j \neq k)} p_{jk}^2 \right] \quad A2$$

2) Bartlett 球形检验用于检验相关矩阵  $R$  是否为单位阵。设样本量为  $n$ 、变量数为  $d$ ，则统计量可写为

$$\chi^2 = -(n-1-(2d+5)/6)\ln|R| \quad A3$$

其自由度为  $d(d-1)/2$ 。当  $p < 0.05$  时拒绝“相关矩阵为单位阵”的原假设，认为变量间存在足够相关性，适合进行降维处理。本研究中  $KMO=0.63>0.5$ ，巴特利特球形度检验  $P<0.05$ ，结果表明此数据适合进行降维聚类处理。

(3) 降维：主成分提取与主成分得分计算

在通过适用性检验后，基于标准化矩阵  $Z$  构造相关矩阵  $R$ （或协方差矩阵），并进行特征分解：

$$Rw_q = \lambda_q w_q, \quad q = 1, \dots, d \quad A4$$

其中  $\lambda_q$  为特征值， $w_q$  为对应特征向量。综合采用碎石图（Scree Plot）与方差解释准则确定主成分数量  $Q$ 。累计解释率定义为

$$\eta(Q) = \left( \sum_{(q=1)}^Q \lambda_q \right) / \left( \sum_{(q=1)}^d \lambda_q \right) \quad A5$$

在满足累计解释率达到阈值且碎石图出现明显拐点的条件下确定  $Q$ 。随后计算站点在潜在空间的低维表示（主成分得分）：

$$y_i = W^T z_i \quad A6$$

其中  $W = [w_1, \dots, w_Q]$  为由前  $Q$  个主成分载荷向量组成的投影矩阵， $y_i$  为站点  $i$  的  $Q$  维潜在表示。将所有站点的  $y_i$  组成矩阵  $Y$ ，作为聚类输入数据。

(4) 最佳聚类数确定

完成特征降维后，需要基于数据自身确定聚类数  $k$ 。对 K-means 等基于中心的聚类方法，采用手肘法（Elbow Method）分析簇内平方和（Within-Cluster Sum of Squares, WCSS）随  $k$  的变化关系：

$$WCSS(k) = \sum_{(c=1)}^k \sum_{(y_i \in C_c)} \|y_i - \mu_c\|^2 \quad A7$$

其中  $C_c$  表示第  $c$  个簇， $\mu_c$  为其质心。通常  $WCSS(k)$  随  $k$  增大而下降，当曲线下落趋势出现明显“拐点”时，对应的  $k$  可视为较合理的聚类数。

(5) 聚类模型构建

在确定聚类参数后，本研究采用三种典型无监督聚类方法进行对比分析：

- 1) K-means：适用于近似球状簇结构；
- 2) Agglomerative Clustering（层次聚类）：自底向上逐步合并簇，能够揭示层级结构；
- 3) DBSCAN（Density-Based Spatial Clustering of Applications with Noise）：基于密度可识别任意形状簇，并对异常点/噪声点具有较强鲁棒性。

(6) 聚类效果评价

采用轮廓系数（Silhouette Coefficient）评价聚类质量。对样本  $y_i$ ，定义： $a(i)$  为  $y_i$  与同簇样本的平均距离； $b(i)$  为  $y_i$  与最近其他簇样本的平均距离，则轮廓系数为

$$s(i) = b(i) - a(i) / \max[a(i), b(i)] \quad A8$$

其取值范围为  $[-1, 1]$ 。 $s(i)$  越接近 1 表明簇内更紧密、簇间更分离；若  $s(i) < 0$  通常表示样本更接近其他簇，聚类效果较差。

本文聚类结果 K-Means、DBSCAN、Agglomerative Clustering 三种轮廓系数分别为 0.46，

-0.46, 0.41。K-means 聚类算法表现最优。

## Supplementary Algorithm 2

---

**Algorithm 2** 基于功率排序的渐进式节点失效策略

---

**Input:** 初始网络  $G^{(0)} = (V^{(0)}, E^{(0)})$ ; 节点功率函数  $\text{sum\_power}(v)$ ; 总步数  $T$

**Output:** 每一步的剩余网络  $\{G^{(t)}\}_{t=0}^T$  及对应的失效节点集合  $\{V_{\text{remove}}^{(t)}\}_{t=1}^T$

```
1:  $N \leftarrow |V^{(0)}|$  ▷ 记录初始节点总数
2: ▷ Step 1: 定义节点功率, 参见  $P(v) = \text{sum\_power}(v)$ 
3: for all  $v \in V^{(0)}$  do
4:    $P(v) \leftarrow \text{sum\_power}(v)$ 
5: end for
6: ▷ Step 2: 按功率从大到小排序生成攻击序列
7: 将  $V^{(0)}$  按  $P(v)$  降序排序, 得到序列  $\pi = (v_1, v_2, \dots, v_N)$ , 使得  $P(v_i) \geq P(v_{i+1})$ 
8: ▷ Step 3: 渐进式攻击与网络更新
9:  $G^{(0)} \leftarrow (V^{(0)}, E^{(0)})$ 
10: for  $t = 1$  to  $T$  do
11:    $p_t \leftarrow 0.1 \times t$  ▷ 本研究中攻击比例每步增加 10%
12:    $n_{\text{remove}}^{(t)} \leftarrow \lfloor p_t \cdot N \rfloor$ 
13:    $V_{\text{remove}}^{(t)} \leftarrow \{v_1, \dots, v_{n_{\text{remove}}^{(t)}}\}$ 
14:    $V^{(t)} \leftarrow V^{(0)} \setminus V_{\text{remove}}^{(t)}$ 
15:    $E^{(t)} \leftarrow \{(u, v) \in E^{(0)} \mid u \in V^{(t)}, v \in V^{(t)}\}$ 
16:    $G^{(t)} \leftarrow (V^{(t)}, E^{(t)})$ 
17:   在  $G^{(t)}$  上计算韧性指标
18:   if  $V^{(t)} = \emptyset$  then
19:     break ▷ 网络完全失效时提前终止
20:   end if
21: end for
22: return  $\{G^{(t)}\}_{t=0}^T, \{V_{\text{remove}}^{(t)}\}_{t=1}^T$  与指标
```

---

### Supplementary Algorithm 3

---

**Algorithm 3** 基于功能分区的分阶段目标攻击策略

---

**Input:** 初始网络  $G^{(0)} = (V^{(0)}, E^{(0)})$ ; 土地用途类型函数  $\text{land\_type}(v) \in \{A, B, R\}$ ; 攻击序列  $\mathcal{L} = (L_1, \dots, L_M)$

**Output:** 每一阶段的剩余网络  $\{G^{(s)}\}_{s=0}^M$  及对应的失效节点集合  $\{V_{\text{remove}}^{(s)}\}_{s=1}^M$

```
1: ▷ Step 1: 功能类型定义
2: for all  $v \in V^{(0)}$  do
3:   指定  $\text{land\_type}(v) \in \{A, B, R\}$  ▷ 如 A 公共管理, B 商业服务业, R 居住
4: end for
5: ▷ Step 2: 定义功能分区攻击顺序
6: 给定攻击序列  $\mathcal{L} = (L_1, L_2, \dots, L_M)$ , 其中  $L_s \in \{A, B, R\}$  表示第  $s$  阶段攻击的功能分区
7: ▷ Step 3: 分阶段目标攻击与网络更新
8:  $G^{(0)} \leftarrow (V^{(0)}, E^{(0)})$ 
9: for  $s = 1$  to  $M$  do
10:   $V_{\text{remove}}^{(s)} \leftarrow \{v \in V^{(s-1)} \mid \text{land\_type}(v) = L_s\}$  ▷ 移除指定功能分区内所有节点
11:   $V^{(s)} \leftarrow V^{(s-1)} \setminus V_{\text{remove}}^{(s)}$ 
12:   $E^{(s)} \leftarrow \{(u, v) \in E^{(s-1)} \mid u \in V^{(s)}, v \in V^{(s)}\}$ 
13:   $G^{(s)} \leftarrow (V^{(s)}, E^{(s)})$ 
14:  在  $G^{(s)}$  上计算韧性指标
15:  if  $V^{(s)} = \emptyset$  then
16:    break ▷ 网络无剩余节点时提前终止
17:  end if
18: end for
19: return  $\{G^{(s)}\}_{s=0}^M, \{V_{\text{remove}}^{(s)}\}_{s=1}^M$  与各阶段韧性指标
```

---
